# Supplementary material for: CFD Analysis on the Air-Side Thermal-Hydraulic Performance of Multi-Louvered Fin Heat Exchangers at Low Reynolds Numbers
Source: Preprints.org preprint supplement (doi:10.20944/preprints201705.0101.v1), 2017-05-12
Supplement: Supplementary file 1 [file supplementary]

(listing pending)
